# Supplementary material
Source: publisher site journal article supplement (https://www.dovepress.com/article/336425)
Supplement: Supplementary file 1 [file get_supplementary_file.php]

Supplementary Table 1. Logic model activities and inputs

| **Activities** | **Inputs** | |
| --- | --- | --- |
| **Resources** | **System** |
| - - 1. Expanding the number of screening centers nationwide | (Human resource(s)) medical personnel and other personnel  (Organization) municipal hospitals, public health center  (Facilities) playgrounds and parking lots | (Infectious disease management system) COVID-19 Diagnostics and Treatment Work Training Program  (Regulations) Guidelines for the Operation of Screening Clinics |
| 1-1-2) Expanding the number of drive-through screening centers nationwide to reduce waiting and risk of infection | (Human resource(s)) medical and administrative personnel at screening centers  (Infectious disease management system) COVID-19 Diagnostics and Treatment Work Training Program  (Resources) negative pressure beds and diagnostic tools (mobile X-Ray device) for patient isolation  (Organization) municipal hospitals, public health center  (Facilities) playgrounds and parking lots | (Regulations) Guidelines for the Operation of Screening Clinics  (Measures) supporting COVID-19 rapid antigen testing |
| 1-1-3) Active surveillance for highly vulnerable facilities | (Human resources) COVID-19 prevention and control managers and administrative personnel | (Program) COVID-19 prevention and control training program for security personnel (Guideline) checking for fever and respiratory symptoms, support management for self-quarantine |
| 1-1-4) Onsite diagnostic testing at the port of entry | (Human resources) medical personnel, public health center staff  (Resources) Seoul Metropolitan Government’s official foreign-language taxi and limousine (transportation service) for asymptomatic foreigners visiting Korea | (Program) COVID-19 prevention and control training program for security personnel  (Laws) Overseas Arrivals Immigration Act, Infectious Disease Prevention and Control Act  (System) border enforcement measures to respond to citizens and foreigners entering the country from abroad, support for diagnostic testing  (Guideline) Guidelines for Operation of Screening Clinics, Provision of Rapid Antigen Testing, Laboratory Testing, Quarantine  (Cooperation/technology) self-quarantine safety protection app |
| 1-1-5) Implementing a prompt evacuation process for people with symptoms (case quarantine process) | (Facilities) infection observation room, infection control room  (Human resources) emergency response-related qualified personnel  (Supplies) negative-pressure ambulance | (System) Establishment of a 1339 reporting system for suspected COVID-19 symptoms. The Transport Support Promotion Team consists of two groups (transfer support and commodity support) responsible for the management of paramedic safety; situation records management, transport ambulance management, purchase of necessary goods, and budget management  (Guideline) The guidelines include the transport standards for each type of suspected COVID-19 patient and the roles and duties of firefighters and fire officials for each stage of disaster response |
| 1-1-6) Laboratory technical workforce increased | COVID-19 prevention and control managers and administrative personnel | (System) consultations between ministries, personnel transfers  (Program) COVID-19 prevention and control training program for security personnel |
| 1-2-1) Epidemiological investigation and contact tracing | 1. Local epidemic intelligence officer 2. Contact tracing app | Personnel training programs, technology, cooperation, laws   1. The legal authority for collecting personal information by amending the Infectious Disease Control and Prevention Act 2. Securing CCTV information with the help of the National Police Agency 3. Provide location information of smartphones 4. Collection of information such as credit card transaction details from credit card companies 5. Computerized Smart Quarantine System |
| 1-2-2) Collection of visitor information at publicly used facilities by means of QR codes | (Resources) smartphone, tablet PC  (Technology) QR code, application  (supplies), guidance on using QR code-based entry logs (KI-PASS) | (Program) COVID-19 Diagnosis and Treatment Training Program  (Cooperation) Naver (QR code-issuing company) and Social Security Information Service, Korea Social Security Information Service  Development and operation of information systems |
| 1-2-3) Traveler self-quarantine management (on-site diagnosis) using an app | (Human resources) medical professionals, exclusive charge government officers, public healthcare center staff  (Resources) 100 special taxis exclusively for inbound travelers, protective equipment  (Infrastructure) local public health centers | (Law) overseas arrivals)) Immigration Act, Infectious Disease Prevention and Control Act  (Program) training program for dedicated public officials, COVID-19 Diagnosis and Treatment Training Program  (Guidelines) Guidelines for Operation of Screening Clinics, Provision of Rapid Antigen Testing, Laboratory Testing, Quarantine, Support for Diagnostic Testing  (Cooperation) self-quarantine safety protection app |
| 1-2-4) Increasing trained contact tracers | (Human resources) securing personnel for epidemiologic investigation at local public health centers, operation of the City and District Joint Mass Infection Rapid Response Team  (Infrastructure) public health center: investigation and management of confirmed cases | (Program) COVID-19 prevention and control training program for COVID-19 prevention and control managers and administrative personnel (Epidemic Intelligence Service) |
| 2-1-1) Implementing tailored physical distancing measures for different settings (facilities, social environment) | (Human resources) COVID-19 prevention and control manager | (Guidelines) Guidelines for Social Distancing by Stage, Guidelines for Workplaces to Prevent the Spread of COVID-19, social distancing guidelines for publicly used facilities  (Cooperation) Seoul Metro, media, press |
| 2-1-2) Infection control at hospital ward(national relief hospital, relief clinic) | (Supplies) negative-pressure tents and mobile X-ray devices (for respiratory symptoms), CT (for severe respiratory symptoms), protective equipment  (Financial resources)  Infection prevention management fee (external and hospitalized), isolation management fee of screening clinics, number of patients covered by health insurance  (Facilities) exclusive external and separate operation of respirators and separate operation of hospital rooms, such as screening clinics and respiratory wards | (Cooperation) The Ministry of Health and Welfare and the Korean Hospital Association designated 91 hospital-level or higher medical institutions by region, including the Seoul metropolitan area |
| 2-2-1) Increased number of operational facilities for quarantine | (Financial resources) utilization of disaster management funds (rescue accounts) and medical personnel utilizing reserve funds  (Facilities) Seoul Metropolitan Development Center (living center), situation room Emergency Operations Center  (Human resources) standby medical staff, human resources, dedicated public officials, and police officers  (Technology) self-quarantine safety protection app, overall situation management system based on GIS | (Infrastructure) 24-hour monitoring, provision of meals for patients in isolation, medical diagnosis, COVID-19 prevention and control activities, and specialized waste disposal  (System) Isolation Facility Admission System, creation of an application system for admission by individuals and establishment of living center admission procedures  (Measures) when symptoms are identified, virus transmission can be reduced by immediately transferring the patient to a medical institution equipped with a screening center |
| 2-2-2) At the airport screening clinic, positive cases are immediately transferred and treated | (Human resources) Seoul Metropolitan Council, volunteers, medical personnel, and dedicated public officials  (Supplies) 200 foreign tourist taxis, 100 special taxis exclusively for inbound travelers, protective suits, and masks  (Infrastructure) health centers in districts and the Sports Complex (exclusive screening center for overseas immigrants) | (Guideline) special transport measures to block COVID-19 from overseas  (Laws) Infectious disease prevention and Control Act  (Program) dedicated civil service education response program |
| 2-2-3) Rapid development for self-quarantine control and operation,human resource expansion and training expertise | (Human resources) the Seoul Metropolitan Government formed the Advisory Group for Response to Novel Coronavirus Infectious Diseases and a prevention and control countermeasure team (Chief Citizen Health Bureau) | (System) operating a 24-hour emergency prevention and control work system, establishment of a testing system for research on public Health and the environment, operation of The Korea Disease Control and Prevention Agency national 1339 hotline  (Regulations) guidelines for the operation of screening clinics |
| 2-3-1) Environmental decontamination in public spaces | (Human resources) COVID-19 prevention and control managers (public officials monitoring consumer food hygiene) and police officers  (Supplies) masks | (Guideline) if businesses violate administrative orders, reports to be made  Operation of a break time system for ventilation and COVID-19 prevention and control (rest for 10 minutes per hour or 30 minutes every 3 hours)  Air sterilizer installation recommendations  (Program) small programs with fewer than 10 people, online reservation systems |
| 2-3-2) Mandatory mask-wearing | (Human resources) emergency response team for handling civil complaints related to masks and COVID-19 prevention and control managers | (Cooperation) districts  (Guideline) response guidelines to prevent the spread of COVID-19 at public and multi-purpose facilities (3rd edition), guidelines for social distancing  (Law) Infectious Disease Control and Prevention Act |
| 2-3-3) Public campaign about personal hygiene and sanitation | (Human resources) Seoul Covid19 Psychological Support Team:  Launch of a website dedicated to COVID-19 in Seoul: unified communication channel | (Cooperation)  Seoul Citizen Communication Planning Office Seoul Metropolitan Government social media channel ‘Seoul in My Hand’, private enterprises (SNOW)  (Campaigns) Enhancement of the ‘Mask Wearing Rules’ campaign. |
| 3-1-1) Establishing severity definition for symptoms | (Human resources) physicians determining which patients are to be hospitalized | (Criteria) utilization of classification standards for patient severity  (Medical system) the central and local governments introduce additional residential treatment centers sequentially as the number of patients increases  System for the co-management of medical resources, joint response system for hospital beds in the metropolitan area |
| 3-1-2) Divide medical processes according to severity | (Facilities) Central Joint Response Situation Room: Identification of patient status and patient notifications of assigned hospital beds through the dispatched urban/provincial personnel, residential treatment center  (Human resources) physicians determining which patients are to be hospitalized | (Criteria) utilization of classification standards for patient severity  (Cooperation) the central and local governments introduce additional residential treatment centers sequentially as the number of patients increases  (Medical system) system for the co-management of medical resources, joint response system for hospital beds in the metropolitan area |
| 3-2-1) Acquire hospital beds for low-risk patients | (Facilities) the ground-level parking lot of Eunpyeong District's Seobuk Hospital, Waiting for space for beds and medical staff  (Resources) negative-pressure devices, oxygen supply devices, and medical call bell  (Human resources) medical staff, Seoul Medical Center COVID-19 Triage Team | (Cooperation) consultation with Seobuk Hospital (a major public hospital in Seoul) on installing shipping container-type mobile hospitals.  (Patient Severity Classification Criteria)  (1) COVID-19 Response Guidelines for Medical Institutions (1-2nd Editions)  (2) COVID-19 Response Guidelines for Local Governments (9-4th Editions) |
| 3-2-2) Acquire quarantine facilities for patients with mild symptoms for COVID‑19 treatment and management | (Infrastructure) negative-pressure beds, available beds for mild patients, Central Joint Situation Room located in a Seoul youth hostel, National Medical Center, video care support system of central monitoring center, mobile diagnosis app ‘Glove-wall.’  (Human resources) (1) Medical support team: specialized medical staff, including infectious disease and internal medicine specialists and nurses at Boramae Hospital  (2) Operation team: Seoul City staff (3) Firefighting and police personnel  (Resources) X-ray machines and thermometers | (Medical services) temperature measurement, respiratory monitoring, psychological treatment for patients with mild infections, consultation, treatment, sample collection, X-ray imaging  (Technology) mobile diagnosis app  (Cooperation) securing of residential treatment centers  (COVID-19 Response Guidelines)  (1) Guidelines for the Operation of COVID-19 Response Residential Treatment Centers  (2) Notice for patients on waiting lists for Seoul's self-governing residential treatment centers and their families  (3) Education materials for standard operation of residential treatment centers  (4) Guidance on how to apply for and claim medical care benefits for residents of the COVID-19 Life Treatment Center  (5) Operational guidance for COVID-19 residential treatment centers  (6) COVID-19 Medical Center Guidelines (6th edition) |
| 3-2-3) Acquire hospital beds for mild to less severe cases | (Resources) equipment related to prevention | (Patient Severity Classification Criteria)  (1) COVID-19 Response Guidelines for Medical Institutions  (1-2nd Editions)  (2) COVID-19 Response Guidelines for Local Governments (9-4th editions)  (Cooperation) Establishment of cooperative systems with local public and private medical facilities  (Guideline) Guidelines for COVID-19 Medical Center Guidelines (6th edition), COVID-19 Response Procedure for State-Designated Hospitalization Treatment Beds (6th edition), Response Guide for Medical Institutions with Confirmed COVID-19 Infections (9-3 editions) |
| 3-2-4) Acquire specialized beds for serious cases | (Infrastructure)  Regional Emergency Medical Centers, Senior General Hospitals, Local Emergency Medical Centers, Local Emergency Medical Centers | (Cooperation) establishment of a cooperative system with local emergency medical centers and emergency medical institutions in the region  (Guideline) Guidelines for COVID-19 Medical Center Guidelines (6th edition), COVID-19 Response Procedure for State-Designated Hospitalization Treatment Beds (6th edition), Response Guide for Medical Institutions with Confirmed COVID-19 Infections |
| 3-3-1) Provision of medical treatment | (Financial resources) Infection prevention management fee (external and hospitalized), isolation management fee for screening clinics, number of patients covered by health insurance | (Guideline) standards for each type of suspected COVID-19 patient  Management Response Guide for Medical Institutions with Confirmed COVID-19 Infections (9-3rd editions)  Guidelines about response procedures for suspected COVID-19 patients  Patient Severity Classification Criteria  Criteria for release from isolation  Acquire medical supplies and materials |
| 3-3-2) Increase the number of dispatched medical personnel | (Human resource(s)) Field surveyor: on-site investigation of emergency rooms and intensive care units of hospitals in the Seoul metropolitan area | (Cooperation) primary medical institution and Seoul Medical Association  (Regulation) administrative disposition in case of failure to comply with the order: Order to commence individual duties in the order of surgery, delivery, dialysis rooms, emergency room, and intensive care units in non-metropolitan areas, and surgery, delivery, and dialysis rooms in metropolitan areas  Failure to comply with an order to commence individual duties shall result in criminal punishment (not more than 3 years in prison or no more than KRW 30 million in fines) and administrative disposition (no more than 1-year license suspension or license cancellation)  (Guideline) Guidelines for Operating Screening Clinics |
| 4-1-1) Financial support by Emergency Coronavirus Relief Funds | (Financial resources) total budget of KRW 3.271 billion  (Human resources) rehabilitation centers and additional 850 personnel for cooperation with and support of districts | (Laws) Seoul Ordinance on Support for the Stability of Living of Low-Income Residents  (Infrastructure/system), Social Security Information System, Seoul Welfare Portal website  (Cooperation) Seoul Council, Dong community centers, districts, Seoul Social Investment Fund Management Deliberation Committee, Seoul Labor and Welfare Policy Office |
| 4-2-1) Supporting and managing the equipment related to preventing spread of the disease | [Support]  (Human resources) volunteers for distribution  (Resources) equipment related to preventing spread of the disease  (Financial resources) KRW 1.6 billion in special grants, special funds | [Support]  (Cooperation) establish the ‘Good Mask’ campaign, connection with vulnerable or low-income senior citizens at Seongsan General Social Welfare Center, delivery system for face masks |
| [Management]  (Human resources) Seoul Labor and Public Welfare Policy Office, Seoul Electronic Commerce Center, Public Welfare Judicial Police Group, Civil-Private Joint Inspection Team | [Management]  (Guideline) Establishment of a plan for mask supply  A 5-day rotation distribution system for face masks  Guideline for Mask Size by the Ministry of Food and Drug Safety  (Cooperation) Seoul Metro, district, consumer organizations, and specialized institutions; Korea Conformity Laboratories  (Laws) Articles 65 and 66 of the Pharmaceutical Affairs Act  Articles 7 and 26 of the Price Stabilization Act |
| 4-3-1) Provision of mental health services via hotlines or apps | (Human resources) Seoul COVID-19 Psychological Support Team, call center staff, experts | (Cooperation) local Mental Health Welfare Centers  (Technology) COVID-19 psychological support, hotline call centers, Seoul Psychological Support Centers (communication media/networks), related websites |
| 4-4-1) Reporting of and frequent public announcements about COVID19 | (Human Resources, cooperation) civic organizations, experts | (System) Launch of a website dedicated to COVID-19 in Seoul as a unified communication channel |
| 4-4-2) Free access to public information in near real-time | (Human resources) Seoul Citizen Communication Planning Office, Seoul New Media Officer, experts, medical professionals | (Technology/system) Seoul YouTube channel, TBS YouTube channel, Open Homepage for COVID-19: Unifying Communication  (Law) Articles 4 (Responsibilities of the State and Local Governments), Article 6, and Article34 and Subparagraph 2, and 34-2 (Disclosure of Information in the Event of an Infectious Disease Risk) of the Infectious Disease Control and Prevention Act |
| 4-4-3) Response to disinformation and fake news | (Human Resources) Seoul Citizen Communication Planning Office, Seoul New Media Officer | (Technology) hotline  (Guideline) standard Operating Procedure  (Cooperation) launch of a website dedicated to COVID-19 in Seoul: unified communication channel |
